# Supplementary material for: Biomarkers of Genotoxicity in Medical Workers Exposed to Low-Dose Ionizing Radiation: Systematic Review and Meta-Analyses
Source: MDPI journal article supplement (doi:10.3390/ijms22147504), 2021-07-13

## Supplementary material

Figure S1: Forest plot of mean differences in NPB between IR exposed and unexposed workers, removing outlier

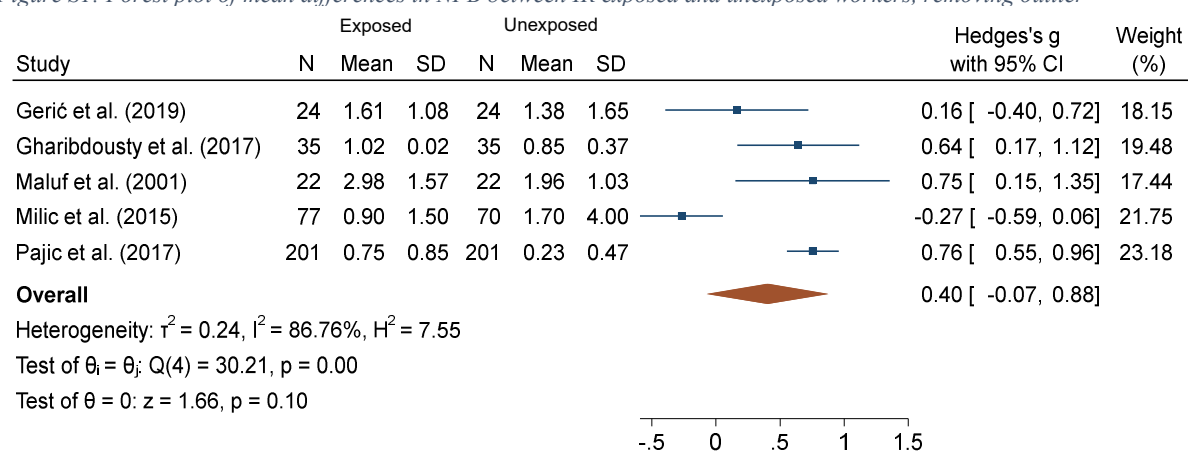

Supplement: s1 [file s1]
